# Supplementary material
Source: Springer Nature journal article supplement (https://www.springermedizin.de/resource/supplementary/12936_2007_380_MOESM1_ESM.pdf/9547678)

# Standards

kDa

170 -

100 -

72 -

55 -

40 -

33 -

24 -

17 -

11 -

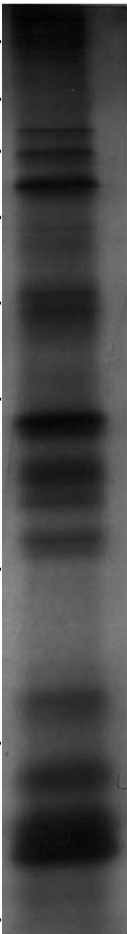

Supplement: MOESM1 [file 9547678]
